# Supplementary material for: Oomycete small RNAs bind to the plant RNA-induced silencing complex for virulence
Source: eLife journal article supplement (doi:10.7554/elife.56096), 2020-05-22
Supplement: supp [file elife-56096-supp-v1.zip]

|                  |                                               |
|------------------|-----------------------------------------------|
| <i>AtAED3r</i>   | 5 ' <b>ACUG</b> AUGUU <b>UAUGGUACUCGA</b> 3 ' |
|                  | 0   0   0   0                                 |
| <i>HpasRNA90</i> | 3 ' CGAUCACAAGUACUAGUAUUU 5 '                 |
|                  | 0   0   0   0                                 |
| <i>AtAED3</i>    | 5 ' GCUAAUGUUCAUGGUCCUAGA 3 '                 |
|                  |                                               |
| <i>AtWNK2r</i>   | 5 ' <b>GAAACCCUGAAGAGCUGGAA</b> 3 '           |
|                  | 0   0 0 00                                    |
| <i>HpasRNA2</i>  | 3 ' CCUCAGGGCUCUUUAAUUUCU 5 '                 |
|                  | 0   0   0                                     |
| <i>AtWNK2</i>    | 5 ' GGAAUCCUGAGGAAUAGAGA 3 '                  |

Figure 4 – figure supplement 2
