# Supplementary material for: Oomycete small RNAs bind to the plant RNA-induced silencing complex for virulence
Source: eLife journal article supplement (doi:10.7554/elife.56096), 2020-05-22
Supplement: supp [file elife-56096-supp-v1.zip]

a

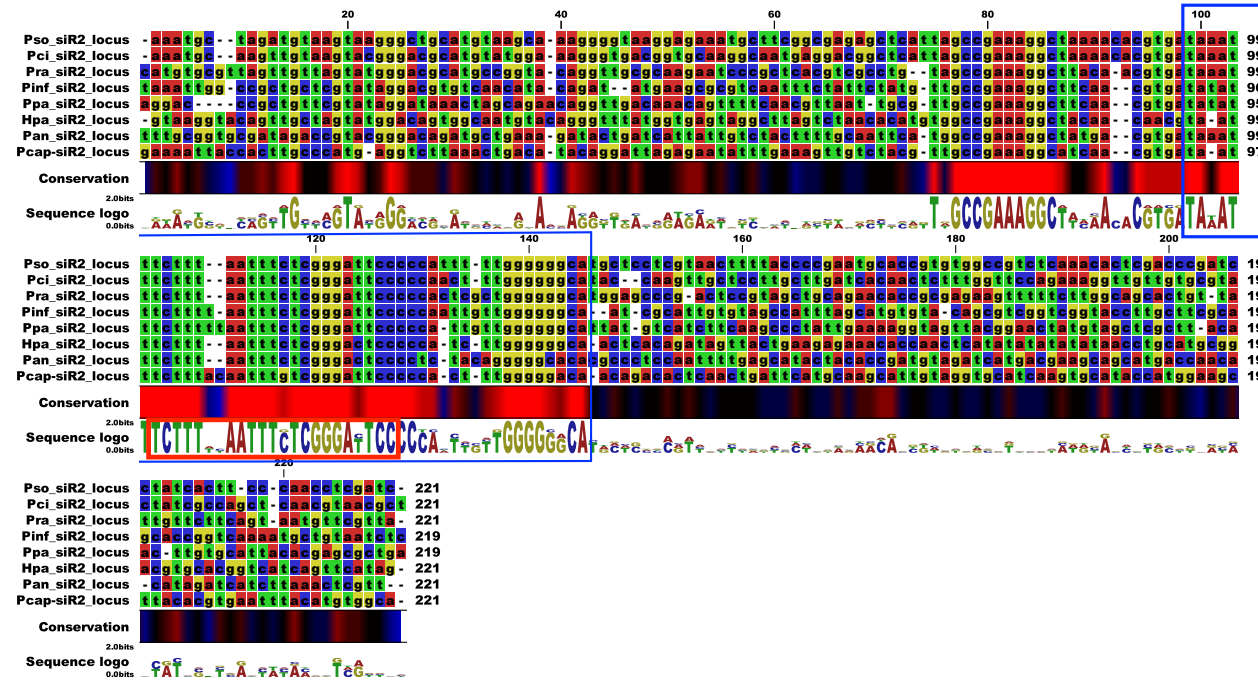

b

*HpasRNA2* 5' UCUUUAAUUUCUCGGGACUCC 3'  
 |||0|||0||0||| |||  
*AtWNK2* 3' AGAGAUUAAGGAGUCCUAAGG 5'

*PcapsRNA2* 5' UUUACAAUUUGUCGGGAUUCC 3'  
 |0| |||0 ||0||| |||  
*AtWNK2* 3' AGAGAUUAAGGAGUCCUAAGG 5'

*PsosRNA2* 5' UCUUUAAUUUCUCGGGAUUCC 3'  
 |||0 | |0 ||0||| |||  
*GmWNK2* 3' AGAGUUCUAGAAGUCCUAAGA 5'

*PinfRNA2* 5' UCUUUAAUUUCUCGGGAUUCC 3'  
 |||0 | |0 ||0||| |||  
*StWNK2* 3' AGAGU-UCUAGAAGUCCUGAAA 5'

*PpasRNA2* 5' UCUUUAAUUUCUCGGGAUUCC 3'  
 |||0 | |0 ||0||| |||  
*NtWNK2* 3' AGAG--UUCUAGAAGUCCUGAAA 5'

Figure 4 – figure supplement 6
