# Supplementary material for: Oomycete small RNAs bind to the plant RNA-induced silencing complex for virulence
Source: eLife journal article supplement (doi:10.7554/elife.56096), 2020-05-22
Supplement: supp [file elife-56096-supp-v1.zip]

a

|           | Noco2 | Cala2 | Emoy2 |
|-----------|-------|-------|-------|
| HpasRNA77 |       |       |       |
| HpasRNA88 |       |       |       |
| HpasRNA78 |       |       |       |
| HpasRNA75 |       |       |       |
| HpasRNA61 |       |       |       |
| HpasRNA2  |       |       |       |
| HpasRNA90 |       |       |       |
| HpasRNA76 |       |       |       |
| HpasRNA96 |       |       |       |
| HpasRNA85 |       |       |       |
| HpasRNA83 |       |       |       |
| HpasRNA53 |       |       |       |
| HpasRNA44 |       |       |       |
| HpasRNA4  |       |       |       |
| HpasRNA74 |       |       |       |
| HpasRNA30 |       |       |       |
| HpasRNA54 |       |       |       |
| HpasRNA39 |       |       |       |
| HpasRNA51 |       |       |       |
| HpasRNA47 |       |       |       |
| HpasRNA36 |       |       |       |
| HpasRNA92 |       |       |       |
| HpasRNA28 |       |       |       |
| HpasRNA38 |       |       |       |
| HpasRNA69 |       |       |       |
| HpasRNA57 |       |       |       |
| HpasRNA82 |       |       |       |
| HpasRNA12 |       |       |       |
| HpasRNA14 |       |       |       |
| HpasRNA52 |       |       |       |
| HpasRNA20 |       |       |       |
| HpasRNA55 |       |       |       |
| HpasRNA43 |       |       |       |
| HpasRNA99 |       |       |       |

■ identical    □ allelic variation

b

| <i>HpasRNA</i>   | Target gene                              | Locus | Mutation location/ consequence |          |             | Number of <i>A. thaliana</i> accessions with mutation |
|------------------|------------------------------------------|-------|--------------------------------|----------|-------------|-------------------------------------------------------|
|                  |                                          |       | Bulge                          | 10/11    | Seed region |                                                       |
| <i>HpasRNA2</i>  | With no lysine (K) kinase 2              | CDS   |                                | Synony.  |             | <b>1</b>                                              |
| <i>HpasRNA12</i> | AAR2 protein family                      | 3'UTR |                                |          |             | <b>3</b>                                              |
| <i>HpasRNA28</i> | E3 ubiquitin ligase                      | 5'UTR |                                |          |             | <b>4</b>                                              |
| <i>HpasRNA28</i> | BTB/POZ domain-containing protein        | CDS   |                                | Missense |             | <b>1</b>                                              |
| <i>HpasRNA30</i> | Polymerase gamma 2                       | CDS   |                                |          | Synony.     | <b>339</b>                                            |
| <i>HpasRNA39</i> | Heat stress transcription factor A-1d    | CDS   |                                |          | Missense    | <b>409</b>                                            |
| <i>HpasRNA47</i> | Transcription factor ORG2                | CDS   |                                |          | Synony.     | <b>122</b>                                            |
| <i>HpasRNA52</i> | Stress response NST1-like protein        | 3'UTR |                                |          |             | <b>17</b>                                             |
| <i>HpasRNA53</i> | Polyadenylate-binding protein            | CDS   |                                | Missense |             | <b>8</b>                                              |
| <i>HpasRNA53</i> | Beta-1,6-N-acetylglucosaminyltransferase | 3'UTR |                                |          |             | <b>2</b>                                              |
| <i>HpasRNA54</i> | NIMA-related kinase 4                    | 5'UTR |                                |          |             | <b>2</b>                                              |
| <i>HpasRNA57</i> | Monocopper oxidase-like protein          | CDS   |                                | Missense | Missense    | <b>1/1</b>                                            |
| <i>HpasRNA57</i> | AtAPC7                                   | 5'UTR |                                |          |             | <b>2/2</b>                                            |
| <i>HpasRNA57</i> | Disease resistance/LRR family protein    | CDS   | Frameshift                     |          | Missense    | <b>1/20</b>                                           |
| <i>HpasRNA69</i> | Tonoplast dicarboxylate transporter      | CDS   |                                |          | Synony.     | <b>6</b>                                              |
| <i>HpasRNA74</i> | Transmembrane protein                    | CDS   |                                |          | Synony.     | <b>1</b>                                              |
| <i>HpasRNA82</i> | ABI2                                     | CDS   |                                | Missense | Synony.     | <b>12/1</b>                                           |
| <i>HpasRNA90</i> | F-box protein                            | CDS   | Frameshift                     |          |             | <b>3</b>                                              |

■ prevents predicted targeting    ■ prevents predicted cleavage by AGO/RISC    ■ weakens predicted targeting

Figure 4 – figure supplement 5
