# Supplementary material for: Oomycete small RNAs bind to the plant RNA-induced silencing complex for virulence
Source: eLife journal article supplement (doi:10.7554/elife.56096), 2020-05-22
Supplement: supp [file elife-56096-supp-v2.zip]

Archive with 22 entries (22 files):
- elife_poa_e56096_Transparent_Reporting_File.docx
- elife_poa_e56096_Figure_1_figure_supplement_1.pdf
- elife_poa_e56096_Figure_1_figure_supplement_2.pdf
- elife_poa_e56096_Figure_1_figure_supplement_3.pdf
- elife_poa_e56096_Figure_1_figure_supplement_4.pdf
- elife_poa_e56096_Figure_1_figure_supplement_5.pdf
- elife_poa_e56096_Figure_2_figure_supplement_1.pdf
- elife_poa_e56096_Figure_2_figure_supplement_2.pdf
- elife_poa_e56096_Figure_2_figure_supplement_3.pdf
- elife_poa_e56096_Figure_2_figure_supplement_4.pdf
- elife_poa_e56096_Figure_2_figure_supplement_5.pdf
- elife_poa_e56096_Figure_2_figure_supplement_6.pdf
- elife_poa_e56096_Figure_3_figure_supplement_1.pdf
- elife_poa_e56096_Figure_4_figure_supplement_1.pdf
- elife_poa_e56096_Figure_4_figure_supplement_2.pdf
- elife_poa_e56096_Figure_4_figure_supplement_3.pdf
- elife_poa_e56096_Figure_4_figure_supplement_4.pdf
- elife_poa_e56096_Figure_4_figure_supplement_5.pdf
- elife_poa_e56096_Figure_4_figure_supplement_6.pdf
- elife_poa_e56096_Supplementary_file_1.xlsx
- elife_poa_e56096_Supplementary_file_2.xlsx
- elife_poa_e56096_Supplementary_file_3.xlsx
