# Supplementary material for: Oomycete small RNAs bind to the plant RNA-induced silencing complex for virulence
Source: eLife journal article supplement (doi:10.7554/elife.56096), 2020-05-22
Supplement: supp [file elife-56096-supp-v2.zip › elife_poa_e56096_Supplementary_file_1.xlsx]

## Sheet: Sheet1
	reads total number	mapping to 100 % to A. thaliana (TAIR10)	mapping to 100% to H. arabidopsidis and A. thaliana	mapping to 100% only to H. arabidopsidis (master genome)	unmapped reads
4 dpi, mock-infected	32666246 (100%)	24070919 (73.68%)	12164538 (37.24%)	173233 (0.53%)	8422094 (25.78%)
4 dpi, Hyaloperonospora-infected	51300261 (100%)	27277198 (53.17%)	14069872 (27.43%)	4475759 (8.72%)	19547304 (38.10%)
7 dpi, mock-infected	65214950 (100%)	49384100 (75.72%)	26990855 (41.39%)	227576 (0.35%)	15603274 (23.92%)
7 dpi, Hyaloperonospora-infected	87671980 (100%)	36159870 (41.24%)	19845298 (22.64%)	18766796 (21.41%)	32745314 (37.35%)
AGO1-IP 3 dpi	129088691 (100%)	109247735 (84.63%)	2834932 (2.19%)	26145 (0.02%)	19814811 (15.35%)
AGO1-IP 4 dpi	47889809 (100%)	35297292 (73.71%)	878152 (1.83%)	333374 (0.69%)	12259143 (25.59%)
AGO2-IP 4 dpi	14720448 (100%)	11405460 (77.48%)	6645388 (45.14%)	127292 (0.86%)	3187696 (21.65%)
