# Supplementary material for: Oomycete small RNAs bind to the plant RNA-induced silencing complex for virulence
Source: eLife journal article supplement (doi:10.7554/elife.56096), 2020-05-22
Supplement: supp [file elife-56096-supp-v2.zip › elife_poa_e56096_Supplementary_file_2.xlsx]

## Sheet: A. thaliana mRNA targets
	HpasRNA	genomic origin	total sRNAs 4 dpi		total sRNAs 7 dpi		AtAGO1 3 dpi		AtAGO1 4 dpi		AtAGO2 4 dpi			TAPIR target prediction				level of target site conservation
			RAW	RPM	RAW	RPM	RAW	RPM	RAW	RPM	RAW	RPM	score	alignment	ATG code	putative function	target site location	types and numbers (in brackets) of target site polymorphisms found in 1135 A. thaliana genomes
1	HpasRNA4	non-annotated region	19	4.24596	396	33.8589	1	38.2482	26	81.8689	5	68.3779	2.5	miRNA_3' GGTAACGAGTTATGACAATGT
														aln o||||||||o||o||||||||
														target_5' TCATTGCTCGATGCTGTTACA	At1g16840	putative transcription factor	5UTR	SNPs (2), deletions (0), insertions (0)
2	HpasRNA12	non-annotated region	23	5.13879	234	19.5575	1	38.2482	3	9.44641	0	0	4	miRNA_3' TCTGAGCGCTCGTGTAGGAAC
														aln |||||o|o||||| ||o||||
														target_5' AGACTTGTGAGCAGATTCTTG	AT1G66510	AAR2 protein family	3UTR	SNPs (4), deletions (2), insertions (0)
3	HpasRNA14	non-annotated region	22	4.91537	226	18.8823	0	0	29	91.3153	3	41.0268	4	miRNA_3' TCTGCTGAGTTCTAGATGCGT
														aln o| |||o ||||||||o||||
														target_5' GGCCGATGCAAGATCTGCGCA	AT4G26940	Hexosyltransferase	Exon	SNPs (0), deletions (0), insertions (0)
4	HpasRNA20	non-annotated region	31	6.9262	182	15.2614	1	38.2482	10	31.488	2	27.3512	4	miRNA_3' TTGGTAAATCTAGGAGTCAGA
														aln |||||||| ||||o||| |||
														target_5' AACCATTTTGATCTTCAATCT	AT3G47990	E3 ubiquitin-protein ligase SIS3	5UTR	SNPs (3), deletions (0), insertions (0)
5	HpasRNA75	non-annotated region	10	2.23426	236	19.7179	0	0	1	3.1488	0	0	1	miRNA_3' ATTGGTCTGCTGATTCGGTTA
														aln |||||| ||||||||||||||
														target_5' TAACCATACGACTAAGCCAAT	AT1G73810	Core-2/I-branching beta-1,6-N-acetylglucosaminyltransferase-like protein	3UTR	SNPs (1), deletions (0), insertions (0)
													4	miRNA_3' ATTGGTCTGCTGATTCGGTTA
														aln o|o| |||||||o|||||||
														target_5' CGATCCGACGACTGAGCCAAT	AT1G03780	Protein TPX2	exon	SNPs (2), deletions (0), insertions (0)
6	HpasRNA39	non-annotated region	38	8.49181	127	11.6188	0	0	19	59.8273	1	13.6756	4	miRNA_3' GTGCAAAGTCGTCGTAGGCTT
														aln |o|||||o|||||||| |||
														target_5' AATGTTTCGGCAGCATCAGAA	AT1G32330	Heat stress transcription factor A-1d	exon	SNPs (5), deletions (0), insertions (0)
7	HpasRNA38	non-annotated region	24	5.36222	128	11.6944	0	0	3	9.44641	0	0	3	miRNA_3' TAAGGGGAAGTGTGCAGCTTC
														aln o||o|||||oo||||||||||
														target_5' GTTTCCCTTTGCACGTCGAAG	AT3G05380	DIRP ;Myb-like DNA-binding domain	exon	SNPs (1), deletions (0), insertions (0)
8	HpasRNA2	non-annotated region	24	5.36222	138	11.5299	2	76.4965	24	75.5713	1	13.6756	3.5	miRNA_3' CCTCAGGGCTCTTTAATTTCT
														aln ||| |||o|||o|||||o|||
														target_5' GGAATCCTGAGGAATTAGAGA	AT3G22420	With no lysine (K) kinase 2	exon	SNPs (1), deletions (0), insertions (0)
9	HpasRNA36	non-annotated region	22	4.91537	132	11.2863	1	38.2482	7	22.0416	0	0	4	miRNA_3' GTTCGAGAGGAGCTACAGGTT
														aln ooo|||| o||o|||||||||
														target_5' TGGGCTCATCTTGATGTCCAA	AT1G55320	AAE18	exon	SNPs (2), deletions (0), insertions (0)
10	HpasRNA28	non-annotated region	14	3.12796	149	12.449	0	0	10	31.488	0	0	3	miRNA_3' TAAGGCAGAAGGCGGCGGTAC
														aln |||oo ||||o||||||||||
														target_5' ATTTTCTCTTTCGCCGCCATG	AT5g19430	C3HC4-type RING finger E3 ubiquitin ligase	5UTR	SNPs (3), deletions (0), insertions (0)
													3	miRNA_3' TAAGGCAGAAGGCGGCGGTAC
														aln o||o| ||||||||||||||
														target_5' GTTTCCTCTTCCGCCGCCATC	AT5G66560	BTB/POZ domain-containing protein	exon	SNPs (1), deletions (0), insertions (0)
													3.5	miRNA_3' TAAGGCAGAAGGCGGCGGTAC
														aln ||||| o||||||||||o||
														target_5' CTTCCGGTTTCCGCCGCCGTG	AT1G15390	Peptide deformylase	exon	SNPs (2), deletions (0), insertions (0)
11	HpasRNA51	non-annotated region	26	5.8976	111	9.27474	0	0	7	22.0416	1	13.6756	3.5	miRNA_3' GTTAGTCATTACAGTTTCAGC
														aln ||||||||o||||||| |||
														target_5' CAATCAGTGATGTCAATGTCT	AT4G27220	NB-ARC domain-containing disease resistance protein	exon	SNPs (2), deletions (0), insertions (0)
													4	miRNA_3' GTTAGTCATTACAGTTTCAGC
														aln | |||||||o||||||| |||
														target_5' CTATCAGTAGTGTCAAATTCG	At3g15900	homoserine O-acetyltransferase	exon	SNPs (0), deletions (0), insertions (0)
12	HpasRNA52	non-annotated region	25	5.58564	109	9.16974	0	0	1	3.1488	0	0	4	miRNA_3' TGTGCAGAAGACTTAGGGGAA
														aln | |o||o||||||||o|o|||
														target_5' AGATGTTTTCTGAATTCTCTT	AT4G25690	stress response NST1-like protein	3UTR	SNPs (2), deletions (0), insertions (0)
13	HpasRNA44	non-annotated region	13	2.94535	121	11.1958	0	0	4	12.5952	0	0	4	miRNA_3' GGCAGTGAACCAGAAGCTTAC
														aln o ||o||| |||o||||||||
														target_5' TGGTTACTCGGTTTTCGAATG	AT3G19830	Calcium-dependent lipid-binding (CaLB domain) family protein	exon	SNPs (2), deletions (0), insertions (0)
14	HpasRNA47	non-annotated region	18	4.21664	115	9.68275	0	0	3	9.44641	0	0	3	miRNA_3' GTTCAGATTGGCAGGTTCTAC
														aln ||||||| |o||||||||||
														target_5' CAAGTCTCATCGTCCAAGATT	AT3G56970	Transcription factor ORG2	exon	SNPs (3), deletions (0), insertions (0)
													4	miRNA_3' GTTCAGATTGGCAGGTTCTAC
														aln ||| ||| |o||||||||||
														target_5' CAAATCTCATCGTCCAAGATT	AT3G56980	Transcription factor ORG3	exon	SNPs (0), deletions (0), insertions (0)
15	HpasRNA43	non-annotated region	11	2.45768	122	11.1931	1	38.2482	5	15.744	0	0	3.5	miRNA_3' TTGTCATTTAAAGTCAGCAGT
														aln ||o||||||| |||||o||||
														target_5' AATAGTAAATCTCAGTTGTCA	AT3G47910	Ubiquitin carboxyl-terminal hydrolase-related protein	exon	SNPs (0), deletions (0), insertions (0)
16	HpasRNA76	non-annotated region	28	6.25592	77	6.43337	1	38.2482	0	0	2	27.3512	3	miRNA_3' CGGTCTGACGAGGTAGGGCGC
														aln || | ||||||||||||o|||
														target_5' GCAAAACTGCTCCATCCTGCG	AT2G26440	Probable pectinesterase/pectinesterase inhibitor 12	exon	SNPs (0), deletions (0), insertions (0)
17	HpasRNA30	non-annotated region	3	0.672774	140	11.6973	0	0	11	34.6368	0	0	2.5	miRNA_3' GTCTCAAATCCTTACCTTTAA
														aln |||o |||||||||||||o||
														target_5' CAGGTTTTAGGAATGGAAGTT	AT3G51630	Probable serine/threonine-protein kinase WNK5	exon	SNPs (0), deletions (0), insertions (0)
													3.5	miRNA_3' GTCTCAAATCCTTACCTTTAA
														aln oo||.|||o||||||||o|||
														target_5' TGGATTTTGGGAATGGAGATT	AT4G34410	Ethylene-responsive transcription factor ERF109	exon	SNPs (1), deletions (0), insertions (0)
													3.5	miRNA_3' GTCTCAAATCCTTACCTTTAA
														aln |||| |||o|||||||||| |
														target_5' CAGATTTTGGGAATGGAAAAT	AT1G50840	polymerase gamma 2	exon	SNPs (2), deletions (0), insertions (0)
													4	miRNA_3' GTCTCAAATCCTTACCTTTAA
														aln o|||||| o||o||||||||
														target_5' TAGAGTTAGGGGATGGAAATG	AT2G19430	THO complex subunit 6	exon	SNPs (1), deletions (0), insertions (0)
18	HpasRNA54	non-annotated region	13	2.94535	105	8.77277	1	38.2482	8	25.1904	0	0	3.5	miRNA_3' GTGAGGTGGTGTCACGGCCAT
														aln | ||o||||||o|||o|||||
														target_5' CTCTTCACCACGGTGTCGGTA	AT3G63280	NIMA-related kinase 4	5UTR	SNPs (3), deletions (0), insertions (0)
19	HpasRNA53	non-annotated region	12	2.6812	107	8.93987	0	0	9	28.3392	0	0	4	miRNA_3' GATTGGTCTGCTGATTCGGTT
														aln o|||| o|||||||| |||||
														target_5' TTAACGGGACGACTATGCCAA	AT1G47490	Polyadenylate-binding protein RBP47C	exon	SNPs (4), deletions (0), insertions (0)
													2	miRNA_3' GATTGGTCTGCTGATTCGGTT
														aln |||||| |||||||||||||
														target_5' ATAACCATACGACTAAGCCAA	AT1G73810	Core-2/I-branching beta-1,6-N-acetylglucosaminyltransferase family protein	3UTR	SNPs (2), deletions (0), insertions (0)
20	HpasRNA61	non-annotated region	15	3.35139	93	7.77177	3	114.745	1	3.1488	1	13.6756	2	miRNA_3' CAGGTAGTCTAGACCACTCTT
														aln |||||oo|||||||||||||
														target_5' TTCCATTGGATCTGGTGAGAA	AT3G55640	Ca-dependent solute carrier-like protein	exon	SNPs (0), deletions (0), insertions (0)
21	HpasRNA55	non-annotated region	11	2.45768	102	8.52212	0	0	4	12.5952	0	0	4	miRNA_3' TTGTATCTCTTTCTGCGGCAT
														aln || ||o |||||||o|||||o
														target_5' AAGATGCAGAAAGATGCCGTG	AT3G24460	Serinc-domain containing serine and sphingolipid biosynthesis protein	exon	SNPs (0), deletions (0), insertions (0)
22	HpasRNA83	non-annotated region	21	4.69194	71	5.93265	1	38.2482	1	3.1488	1	13.6756	3.5	miRNA_3' CTTGTTTAAGTACTGTCTAGT
														aln ||||||o |o||||o||||||
														target_5' GAACAAGGTTATGATAGATCA	AT5G09450	Pentatricopeptide repeat-containing protein	exon	SNPs (0), deletions (0), insertions (0)
23	HpasRNA69	non-annotated region	11	2.45768	85	7.11768	0	0	60	188.928	2	27.3512	4	miRNA_3' TACGTCATCACAAGCTGCCAT
														aln |||o |||||||||||||| o
														target_5' ATGTTGTAGTGTTCGACGGCG	AT5G47560	Tonoplast dicarboxylate transporter	exon	SNPs (1), deletions (0), insertions (0)
24	HpasRNA85	non-annotated region	15	3.35139	69	5.76496	0	0	4	12.5952	3	41.0268	3.5	miRNA_3' CTTCTGCAAGTCGTCGTGGCA
														aln |o||||| ||| |||||||||
														target_5' GGAGACGATCATCAGCACCGT	At2g39950	flocculation protein	exon	SNPs (0), deletions (0), insertions (0)
25	HpasRNA74	non-annotated region	11	2.45768	79	6.64675	2	76.4965	11	34.6368	0	0	4	miRNA_3' GGTTTGCAGTGTCTGGCGCAA
														aln |||||||||| |||o|||||
														target_5' ACAAACGTCACTGACTGCGTT	AT5G07730	transmembrane protein	exon	SNPs (1), deletions (0), insertions (0)
26	HpasRNA87	non-annotated region	13	2.94535	67	5.59786	0	0	3	9.44641	0	0	3.5	miRNA_3' ACTCGTCAGACAGGTCTAGTA
														aln ||||||| o|||||o|||o||
														target_5' TGAGCAGCTTGTCCGGATTAT	AT3G60830	Actin-related protein 7	exon	SNPs (0), deletions (0), insertions (0)
27	HpasRNA57	non-annotated region	1	0.223426	96	8.28271	0	0	73	229.863	4	54.7024	4	miRNA_3' TAGGAAAGGAAGTAGTGACGA
														aln | ||| |||| ||||||||||
														target_5' ACCCTCTCCTACATCACTGCT	AT5G51480	Monocopper oxidase-like protein SKS2	exon	SNPs (3), deletions (0), insertions (0)
													2.5	miRNA_3' TAGGAAAGGAAGTAGTGACGA
														aln |||o||| |||||||o|||||
														target_5' ATCTTTTACTTCATCGCTGCT	AT2G39090	AtAPC7	5UTR	SNPs (2), deletions (0), insertions (1)
													3.5	miRNA_3' TAGGAAAGGAAGTAGTGACGA
														aln | |o|||||||o||||o||||
														target_5' ACCTTTTCCTTTATCATTGCT	AT3G23010	Disease resistance family protein/LRR family protein	exon	SNPs (2), deletions (0), insertions (1)
28	HpasRNA77	non-annotated region	5	1.11713	77	6.43337	1	38.2482	25	78.7201	3	41.0268	3	miRNA_3' AACGAGTTATGACAATGTCAA
														aln |||||| ||||| ||||||||
														target_5' TTGCTCTATACTATTACAGTT	AT5G49030	Isoleucyl-tRNA synthetase	3UTR	SNPs (2), deletions (0), insertions (0)
													4	miRNA_3' AACGAGTTATGACAATGTCAA
														aln |||| oo| o|||||||||||
														target_5' TTGCCTGAAGCTGTTACAGTT	AT5G50170	C2 and GRAM domain-containing protein	exon	SNPs (0), deletions (0), insertions (0)
													3.5	miRNA_3' AACGAGTTATGACAATGTCAA
														aln ||||||o||o||||||||| |
														target_5' TTGCTCGATGCTGTTACAGGT	At1g16840	unknown protein	3UTR	SNPs (2), deletions (0), insertions (0)
29	HpasRNA90	non-annotated region	8	1.78746	67	5.59786	0	0	1	3.1488	1	13.6756	3.5	miRNA_3' CGATCACAAGTACTAGTATTT
														aln ||o||| ||o||||||||||
														target_5' TCTGGTGATCGTGATCATAAA	AT2G23160	F-box protein	exon	SNPs (1), deletions (1), insertions (0)
													4	miRNA_3' CGATCACAAGTACTAGTATTT
														aln |||| ||||||||o||o||o|
														target_5' GCTAATGTTCATGGTCGTAGA	AT1G09750	Aspartyl protease AED3	exon	SNPs (0), deletions (0), insertions (0)
30	HpasRNA96	non-annotated region	9	2.18321	62	5.18113	0	0	1	3.1488	1	13.6756	4	miRNA_3' CGTTTGAAGTCGTTAGAGCCT
														aln || o || ||||||||||||o
														target_5' GCTGCCTGCAGCAATCTCGGG	AT2G42005	Amino acid transporter ANTL1	exon	SNPs (3), deletions (0), insertions (0)
31	HpasRNA99	non-annotated region	9	2.18321	62	5.18113	3	114.745	9	28.3392	0	0	4	miRNA_3' GCGTGAGTCTACTGCTGCTTT
														aln | |o|||||||||||o|||o
														target_5' AGGATTCAGATGACGATGAAG	AT2G34170	unknown protein	exon	SNPs (0), deletions (0), insertions (0)
32	HpasRNA78	non-annotated region	0		77	6.43337	1	38.2482	0	0	0	0	4	miRNA_3' AGAAGGTGCATCGAACGGATC
														aln |o|||| o| |||||||||||
														target_5' TTTTCCTTGAAGCTTGCCTAG	AT2G38820	Protein of unknown function	5UTR	SNPs (1), deletions (0), insertions (0)
													3	miRNA_3' AGAAGGTGCATCGAACGGATC
														aln ||||| || |||||||o||||
														target_5' TCTTCAACTTAGCTTGTCTAG	AT3G21250	Multidrug resistance-associated protein 6	exon	SNPs (0), deletions (0), insertions (0)
33	HpasRNA82	non-annotated region	2	0.446852	71	5.93265	2	76.4965	2	6.29761	0	0	3	miRNA_3' TCCAAGACGGTCAAGCAACGA
														aln || |||| |o|||||||||||
														target_5' AGTTTCTTCTAGTTCGTTGCT	AT5G57050	AtABI2	exon	SNPs (4), deletions (0), insertions (0)
34	HpasRNA92	annotated protein-coding gene	3	0.672774	65	5.43764	2	76.4965	0	0	0	0	4	miRNA_3' TAAGGAGTCCAGAGTATTAGA
														aln o|||o||| ||o||||o||||
														target_5' GTTCTTCACGTTTCATGATCT	AT1G49210	E3 ubiquitin-protein ligase ATL76	exon	SNPs (2), deletions (0), insertions (0)
