# Supplementary figures and images for: Oomycete small RNAs bind to the plant RNA-induced silencing complex for virulence
Source: eLife journal article supplement (doi:10.7554/elife.56096), 2020-05-22

a

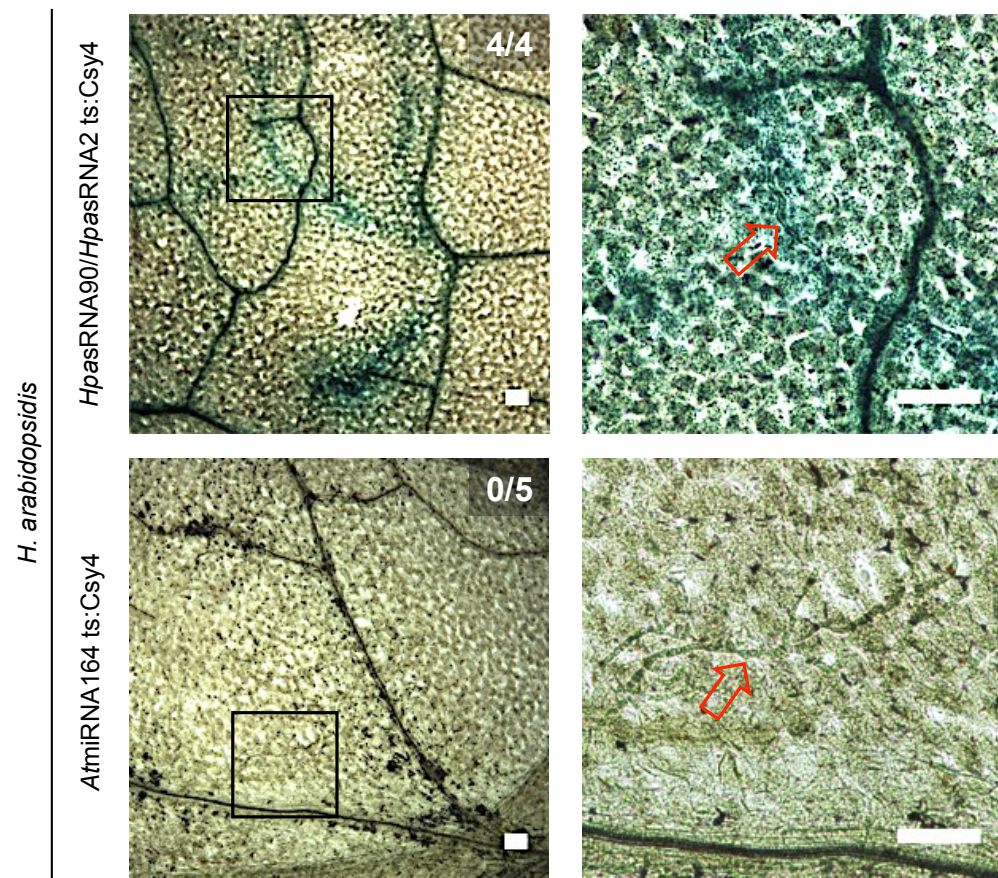

b

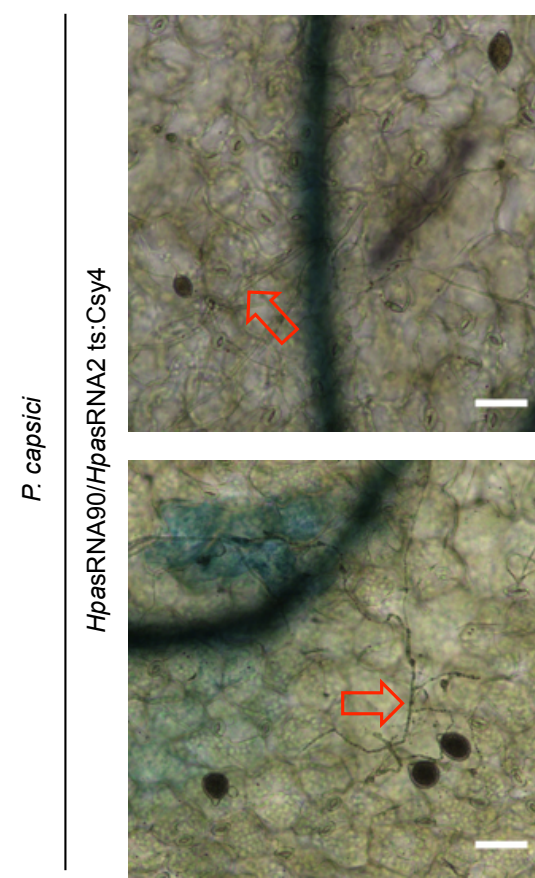

Figure 1 – figure supplement 5

Supplement: supp [file elife-56096-supp-v1.zip]

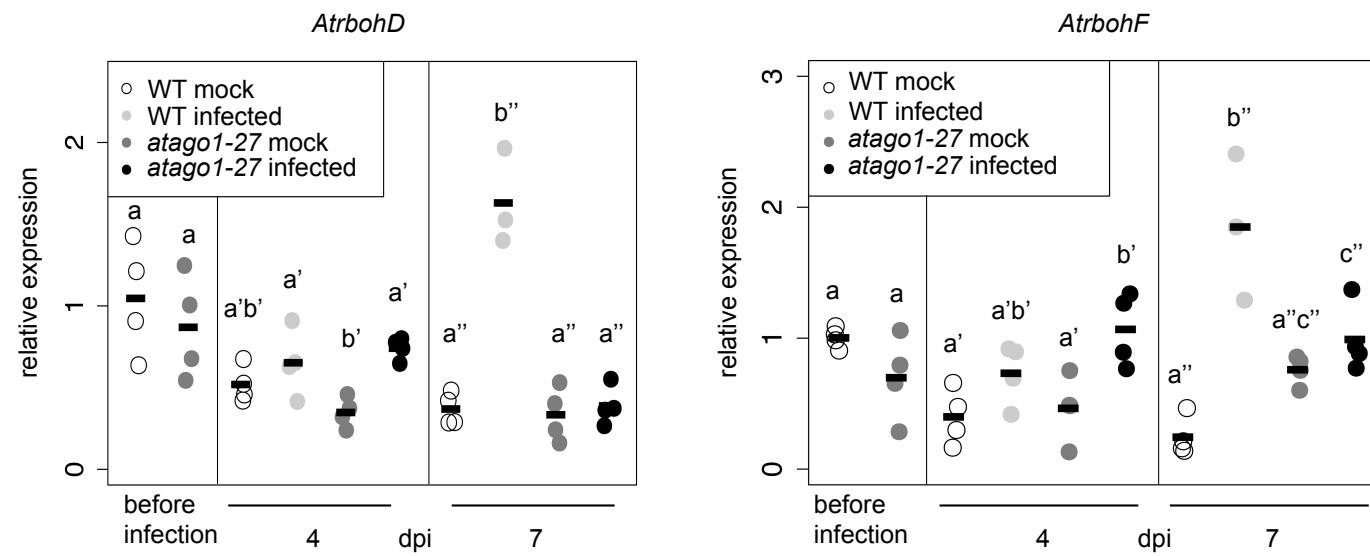

Figure 2 – figure supplement 5

Supplement: supp [file elife-56096-supp-v1.zip]

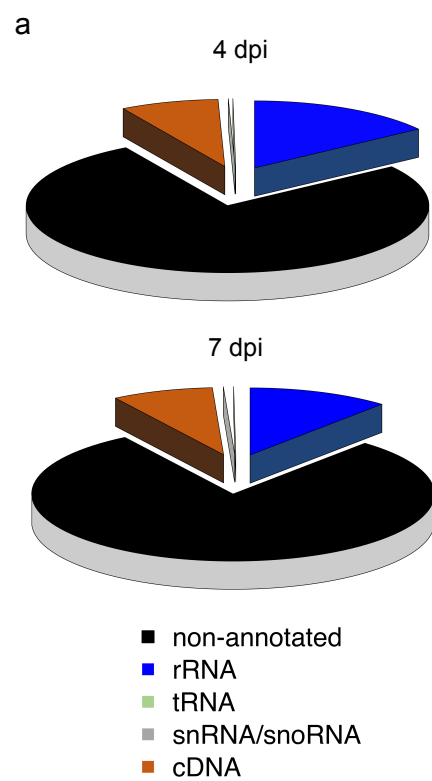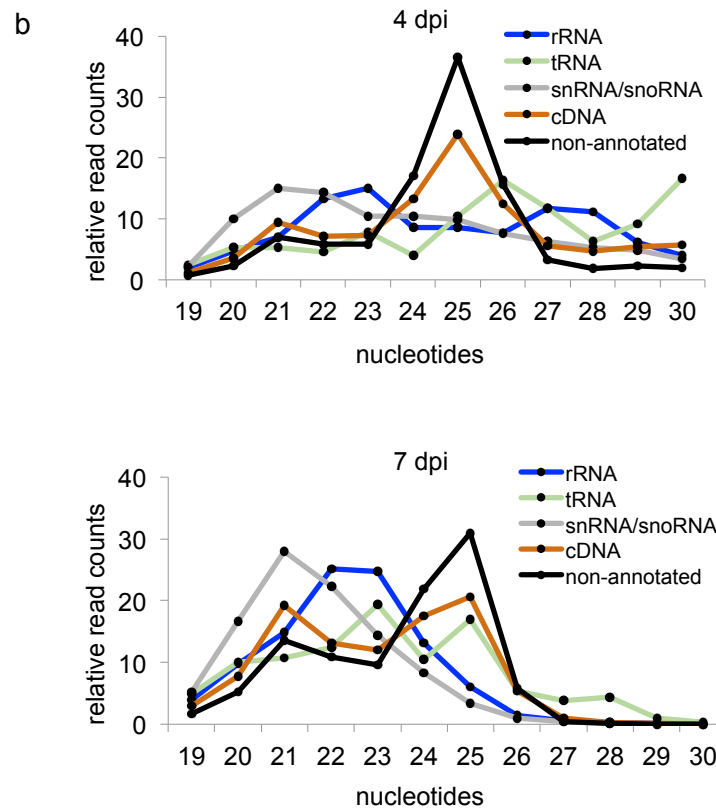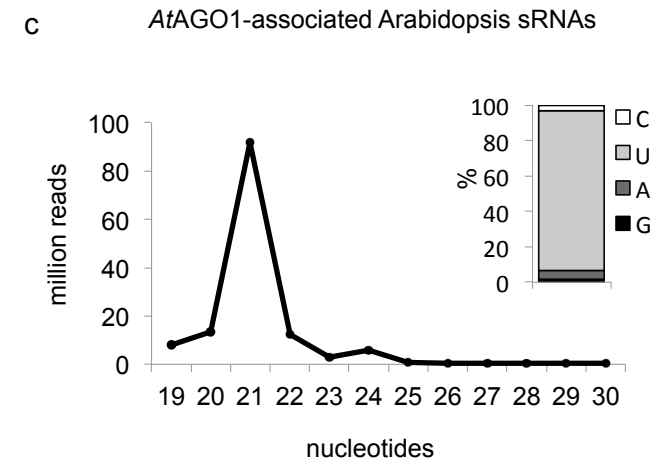

Figure 1 - figure supplement 1

Supplement: supp [file elife-56096-supp-v1.zip]

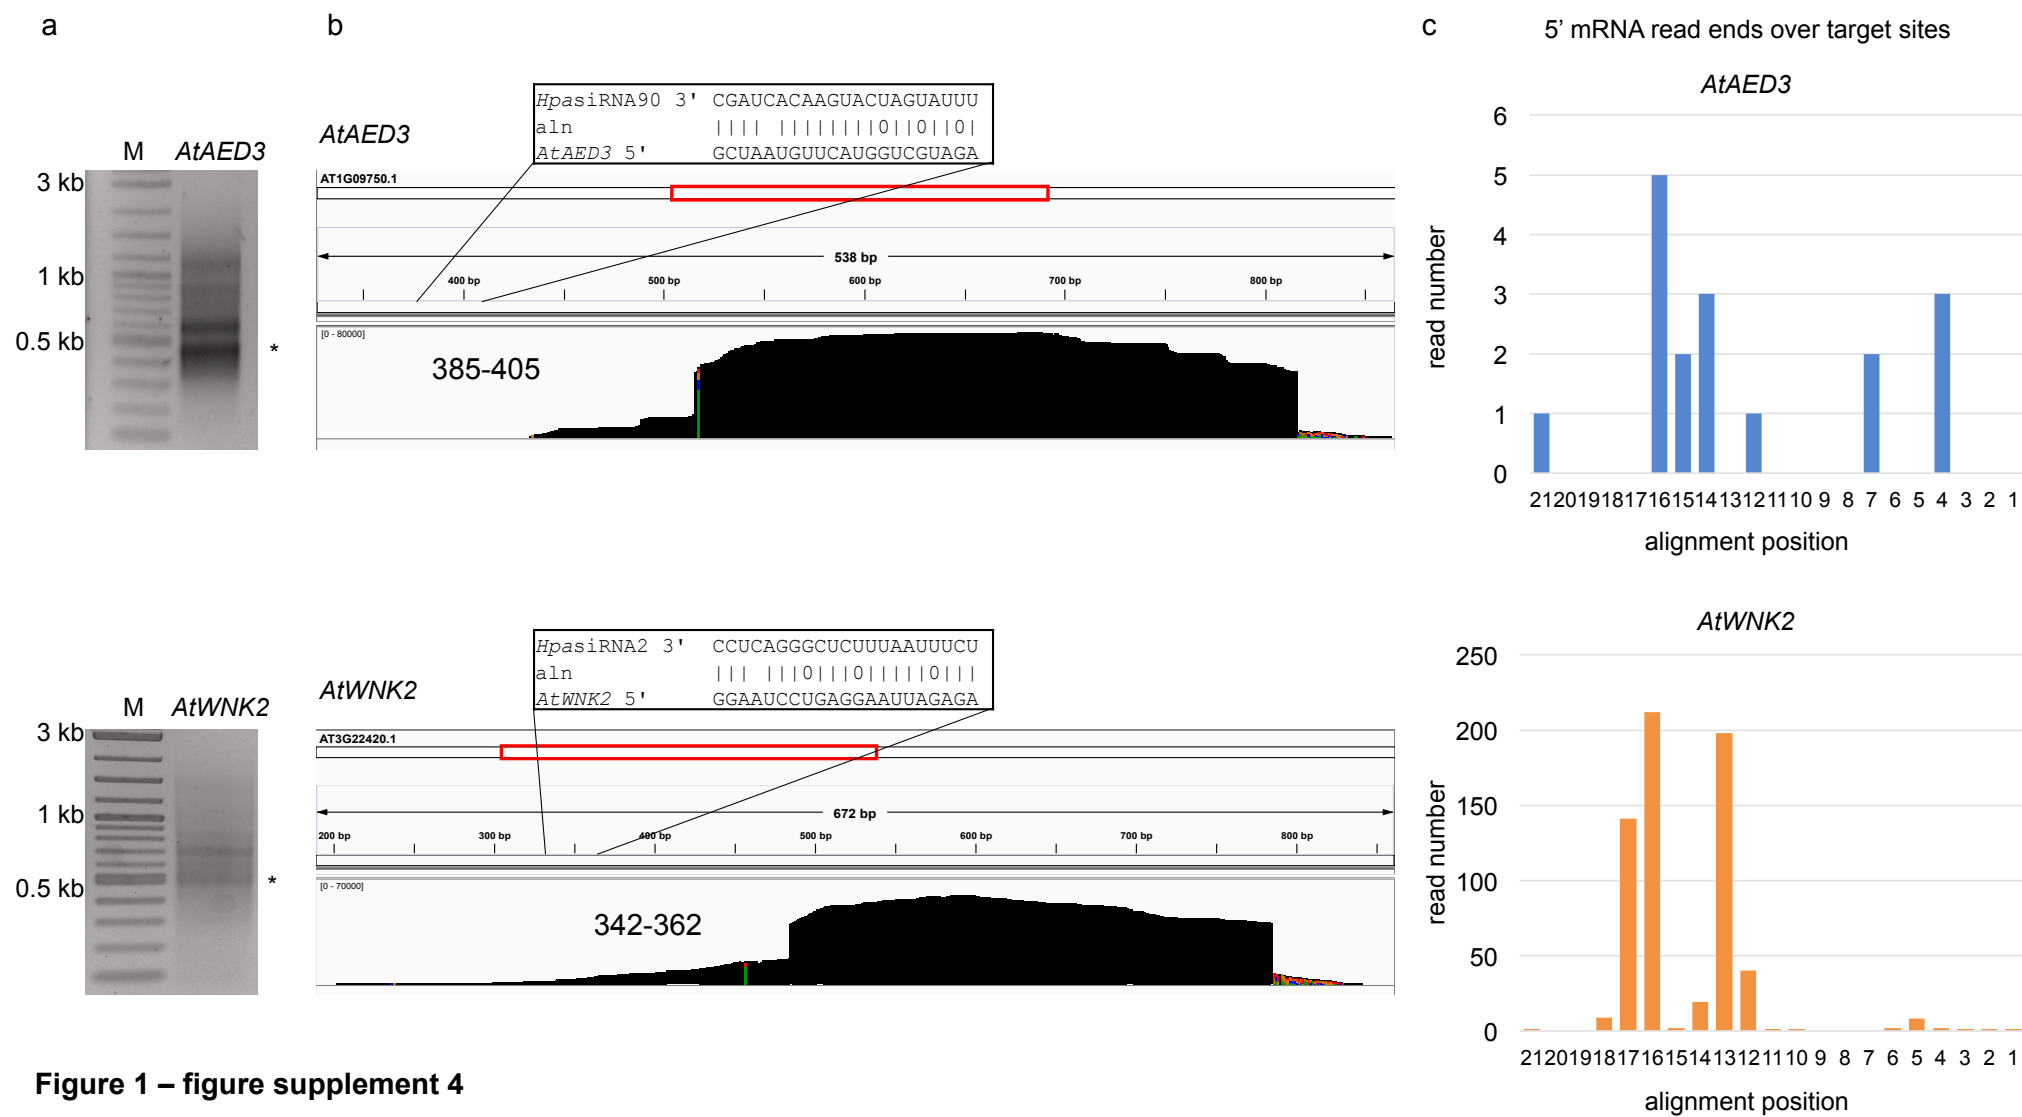

Figure 1 – figure supplement 4

Supplement: supp [file elife-56096-supp-v1.zip]

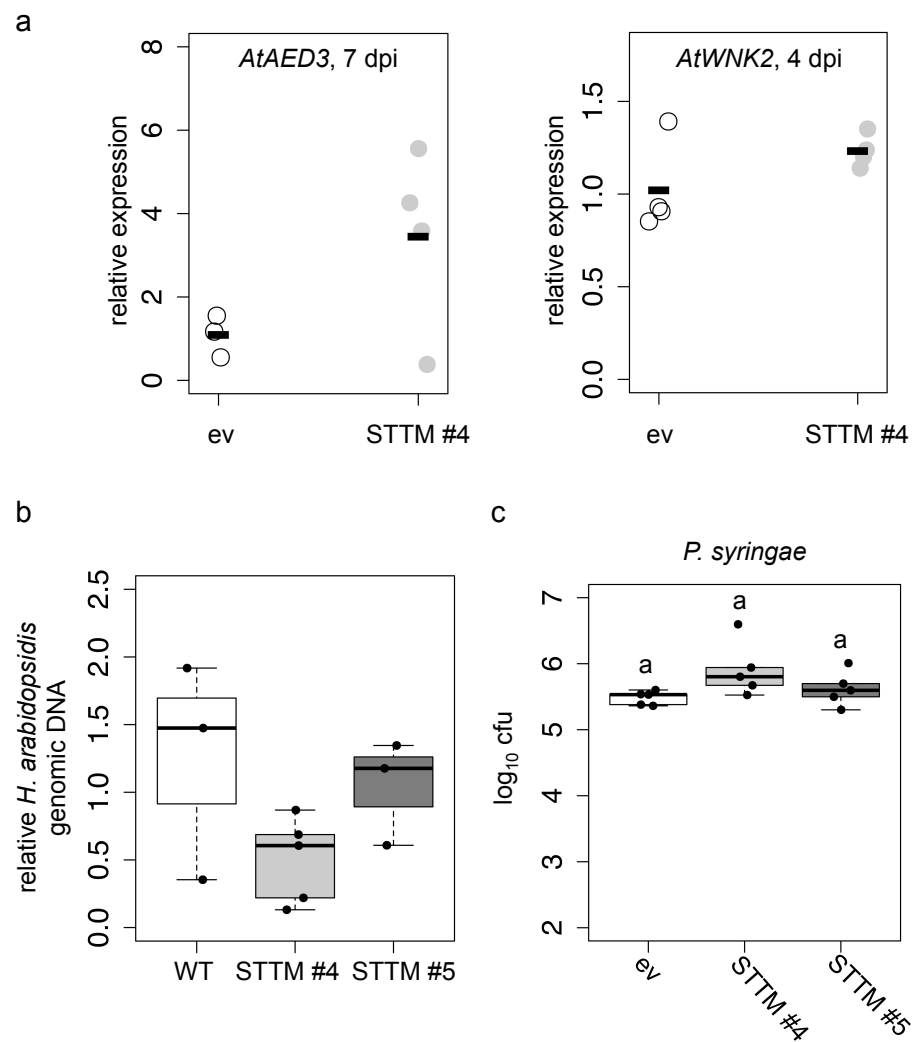

**Figure 3 – figure supplement 1**

Supplement: supp [file elife-56096-supp-v1.zip]

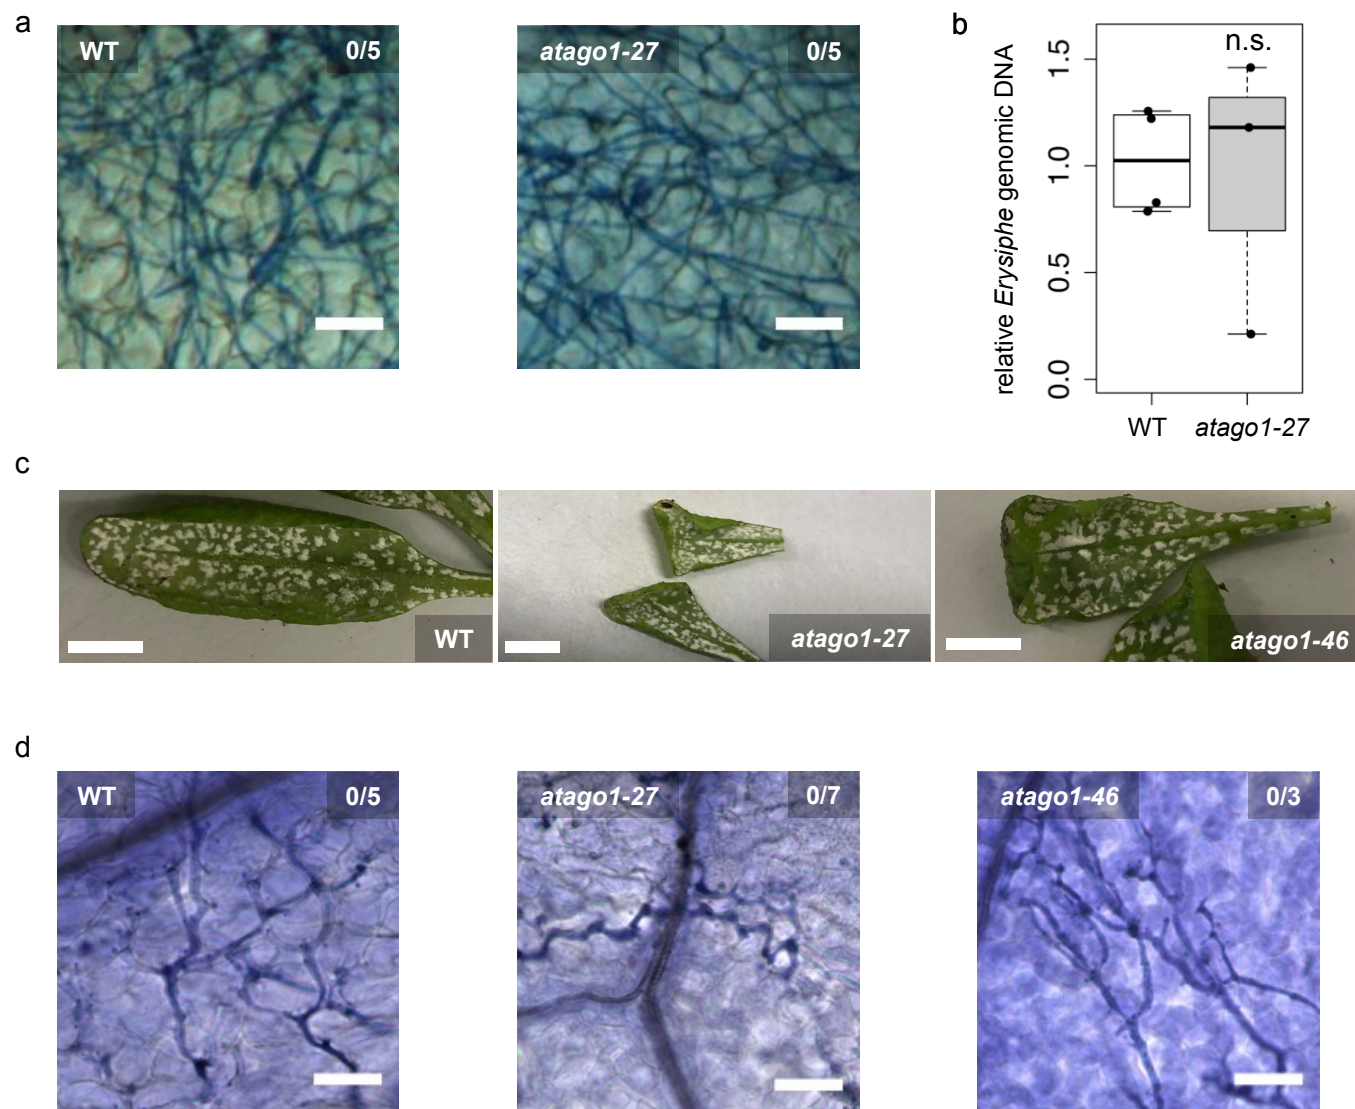

Figure 2 - figure supplement 6

Supplement: supp [file elife-56096-supp-v1.zip]

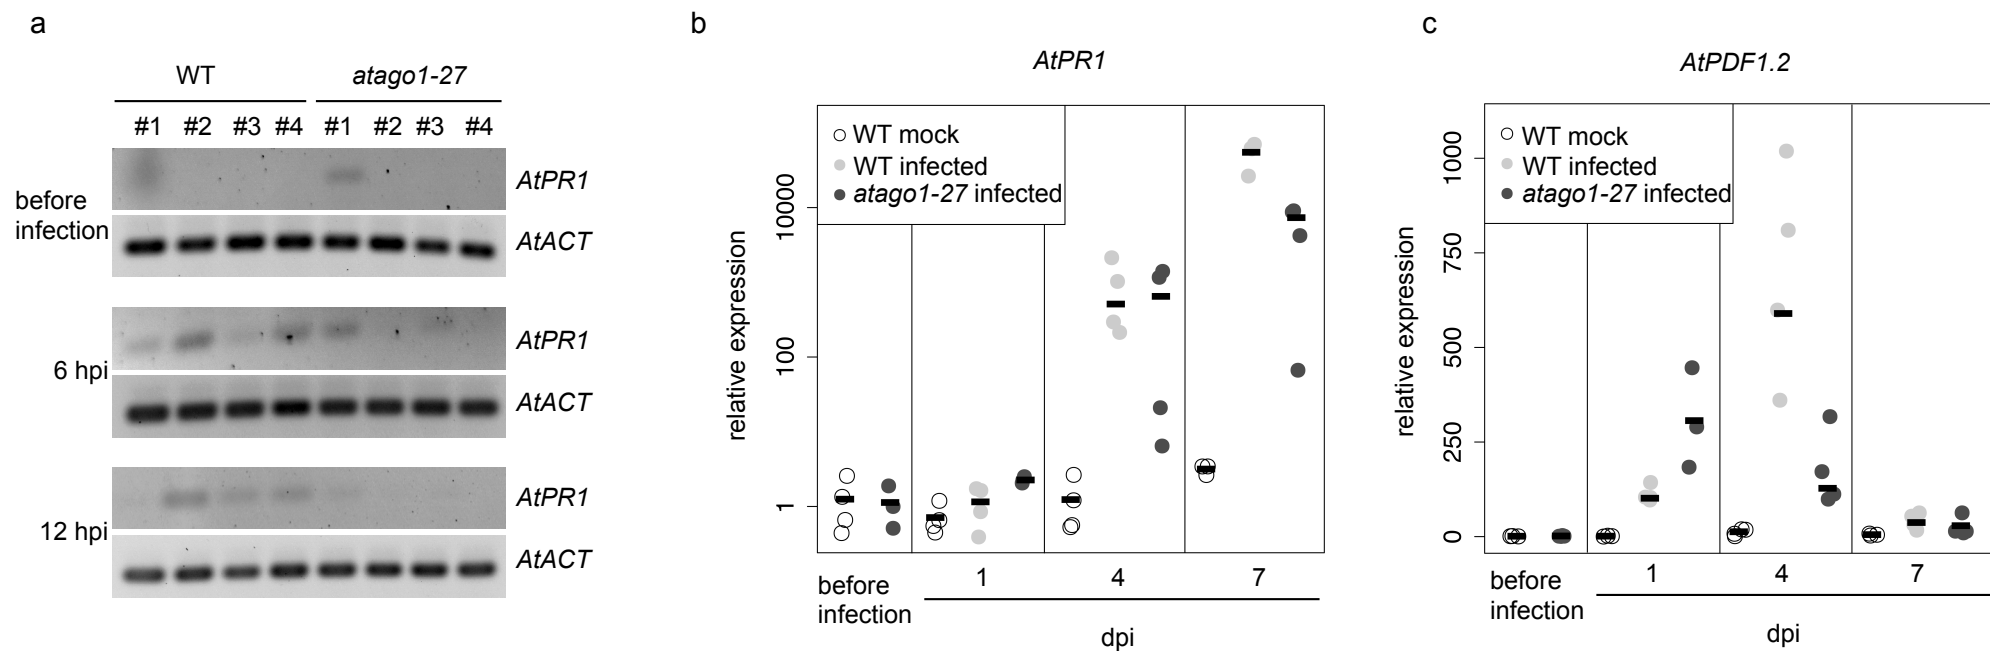

Figure 2 – figure supplement 4

Supplement: supp [file elife-56096-supp-v1.zip]

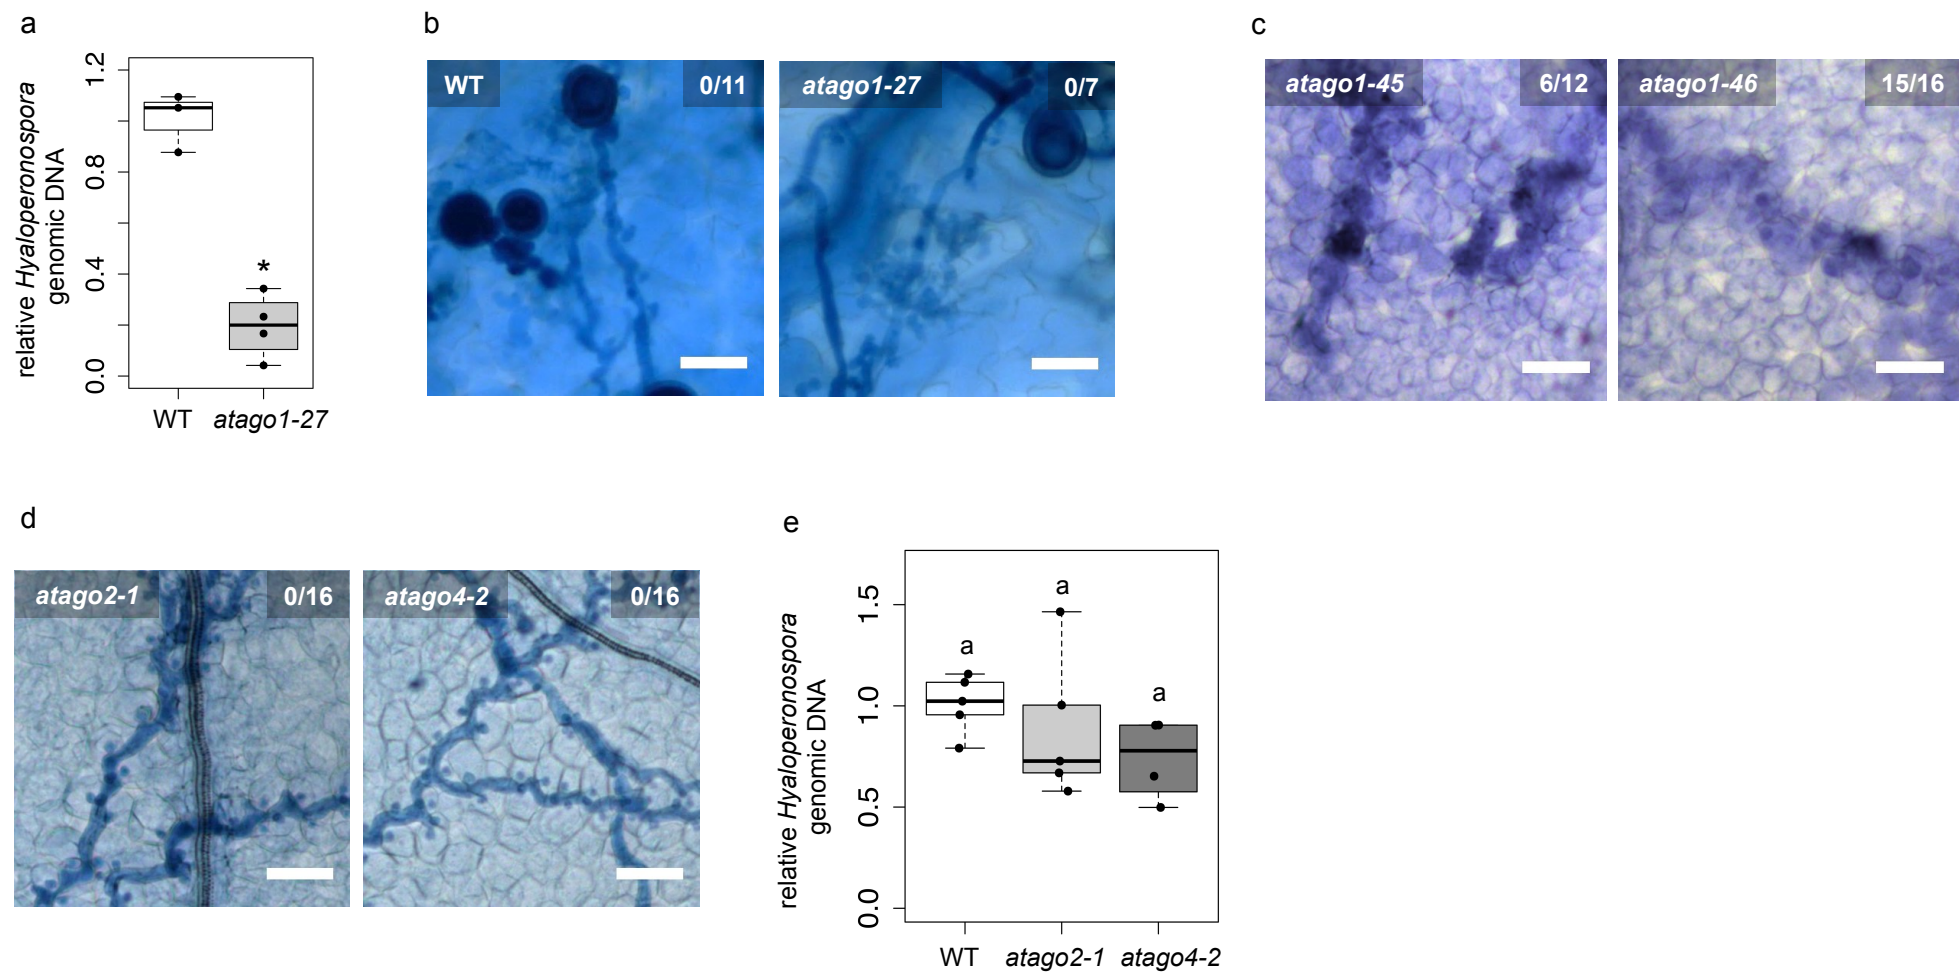

Figure 2 – figure supplement 1

Supplement: supp [file elife-56096-supp-v1.zip]

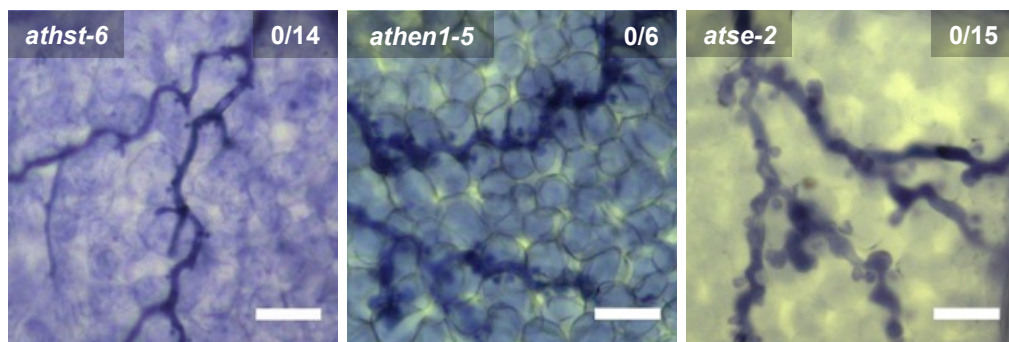

Figure 2 – figure supplement 3

Supplement: supp [file elife-56096-supp-v1.zip]

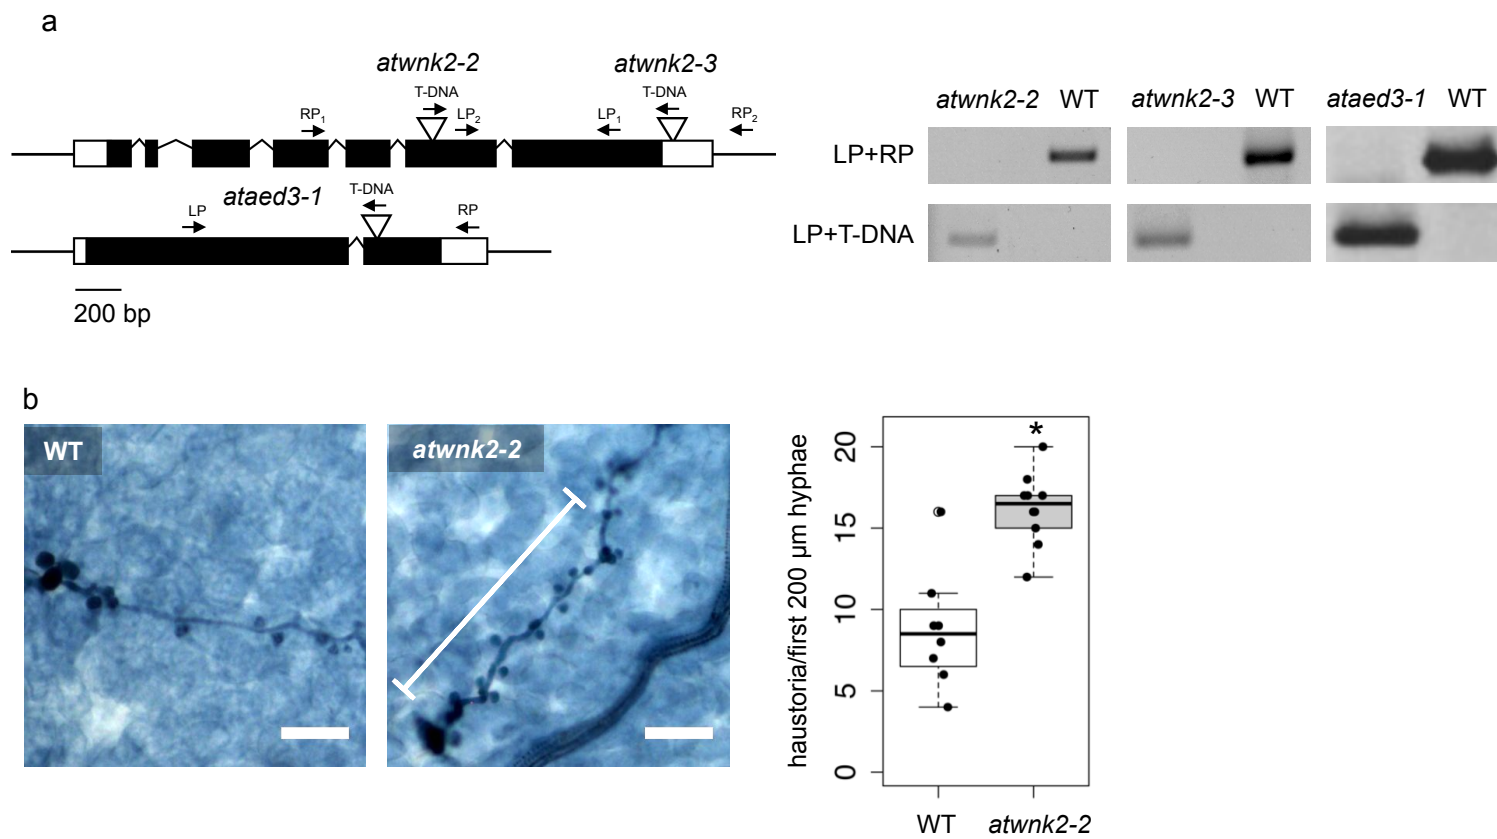

Figure 4 – figure supplement 1

Supplement: supp [file elife-56096-supp-v1.zip]

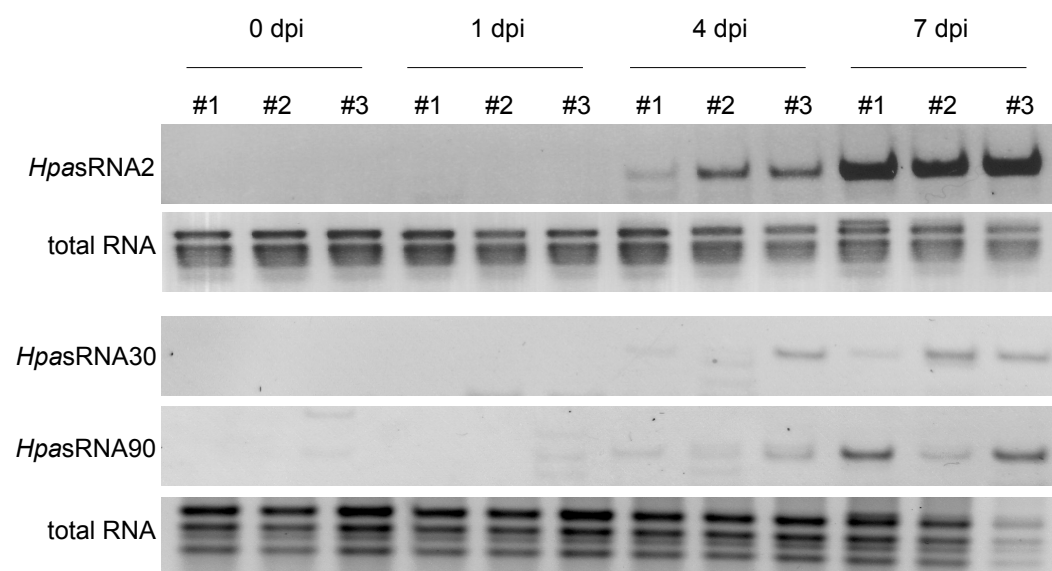

Figure 1 - figure supplement 2

Supplement: supp [file elife-56096-supp-v1.zip]

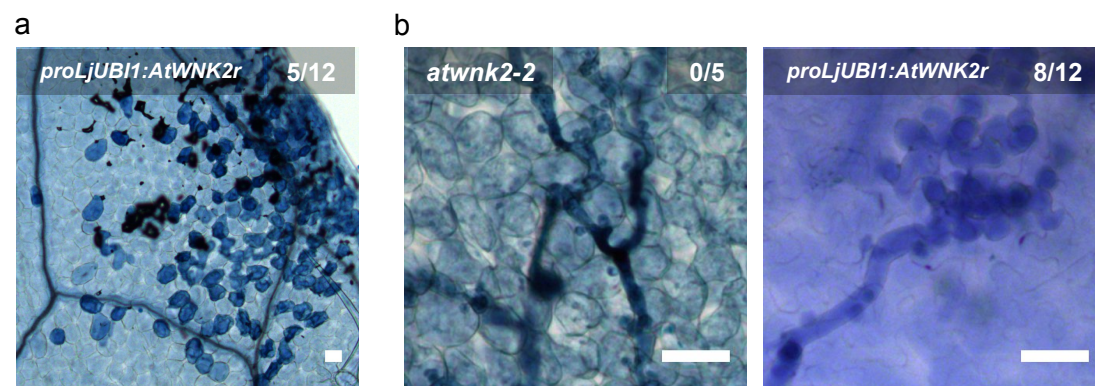

Figure 4 – figure supplement 4

Supplement: supp [file elife-56096-supp-v1.zip]

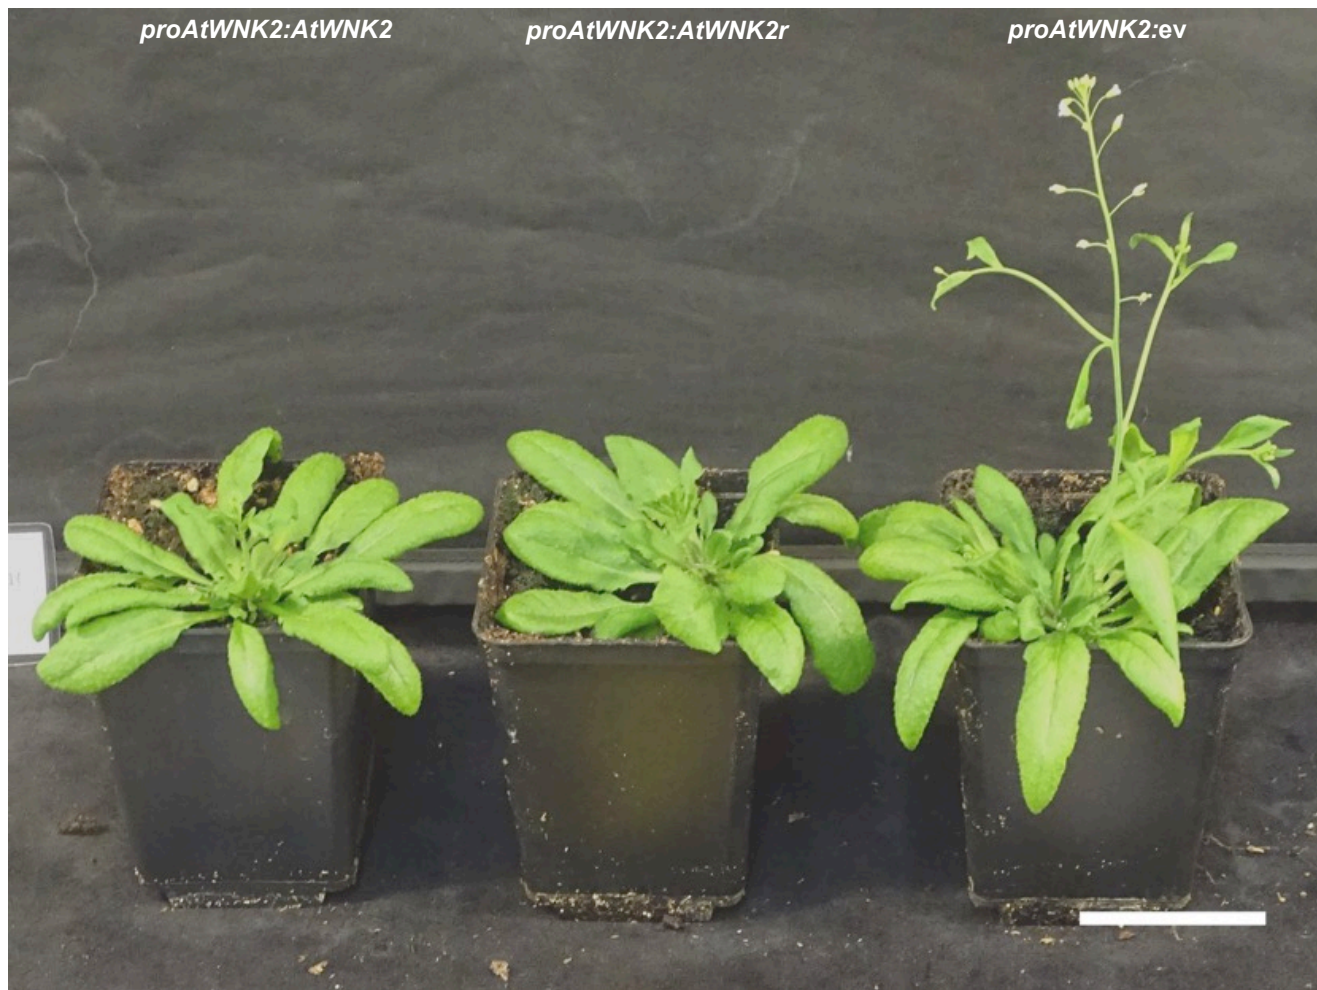

Figure 4 – figure supplement 3

Supplement: supp [file elife-56096-supp-v1.zip]

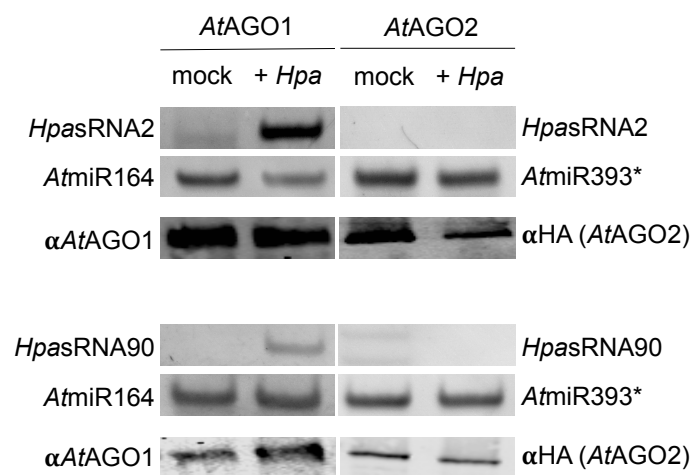

Figure 2 – figure supplement 2

Supplement: supp [file elife-56096-supp-v1.zip]

a

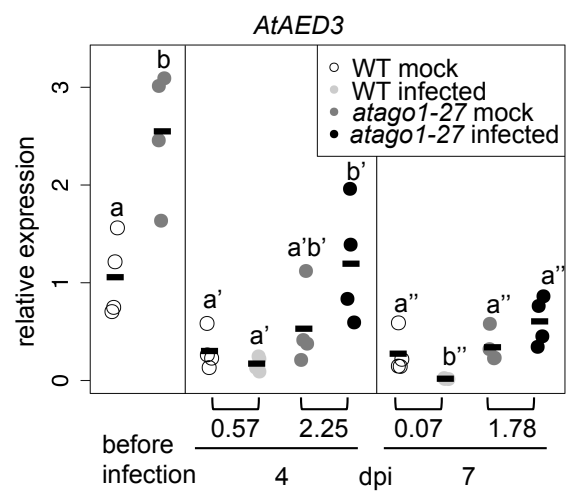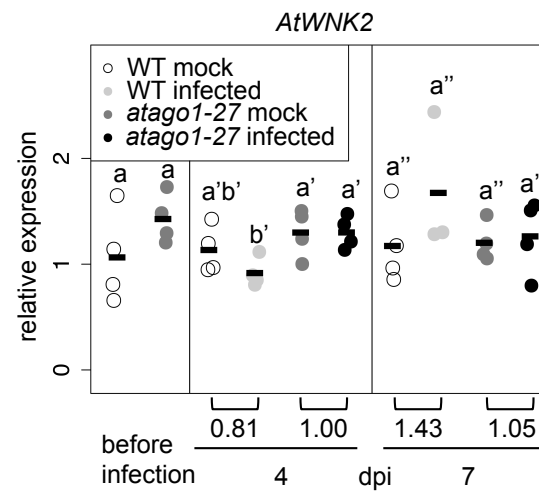

b

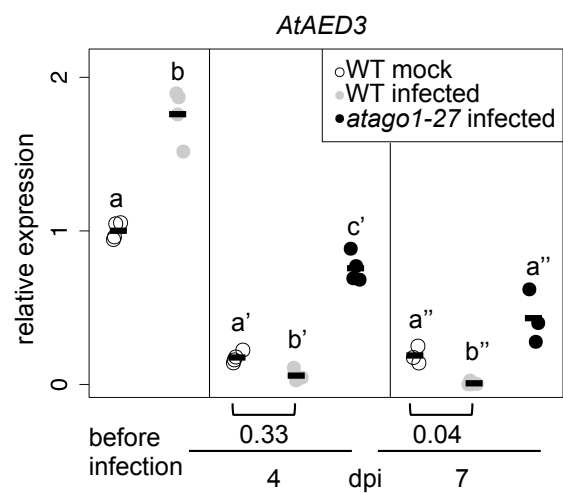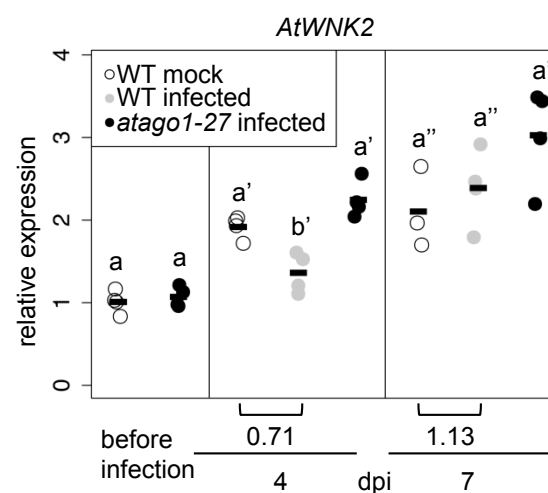

Figure 1 – figure supplement 3

Supplement: supp [file elife-56096-supp-v1.zip]
